# Supplementary material for: Mechanisms of cell death pathway activation following drug-induced inhibition of mitochondrial complex I
Source: PubMed Central journal article supplement — Redox Biol. 2015 Jan 16;4:279–88. doi: 10.1016/j.redox.2015.01.005 (PMC4315936; doi:10.1016/j.redox.2015.01.005), 2015-01-16
Supplement: mmc2.pdf [file mmc2.pdf]

**Supplementary Table 1**

Primers and PCR conditions for Sirt3 genotyping

| Primer sequence (5' -)                                                                       | PCR conditions                                                                                                  |
|----------------------------------------------------------------------------------------------|-----------------------------------------------------------------------------------------------------------------|
| CTT CTG CGG CTC TAT ACA CAG;<br>TGC AAC AAG GCT TTA TCT TCC;<br>TAC TGA ATA TCA GTG GGA ACG. | 94 °C - 3 min<br>94 °C – 30 sec<br>60 °C – 30 sec – 35 cycles<br>72 °C – 30 sec<br>72 °C – 2 min<br>4 °C - hold |
